# Supplementary material for: Asymmetric Bioreduction of Ethyl 4-Chloroacetoacetate into Ethyl 4-Chloro-3-hydroxybutyrate by Recombinant Escherichia coli CgCR in Ethyl Acetate-Betaine:Lactic Acid-Water
Source: MDPI journal article supplement (doi:10.3390/pr11113144), 2023-11-03
Supplement: s1 [file s1]

## Supplementary Materials

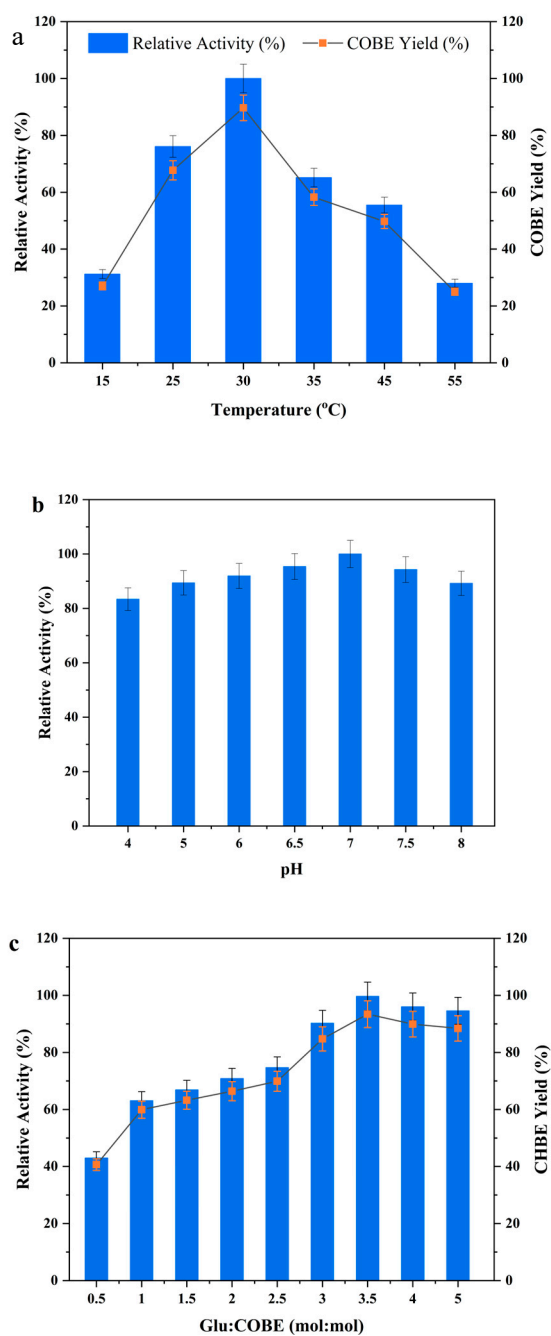

**Figure S1.** Effect of different temperatures (15~55 °C) on the catalytic reactions [100 mM COBE, pH 7.0] (a); Effect of different pH (4~8) on the catalytic reactions n [100 mM COBE, 30 °C] (b); Effect of different metal ions on the catalytic reactions (c); Effect of co-substrate glucose loading on the catalytic reactions [100 mM COBE, 30 °C and pH 7.0] (d).

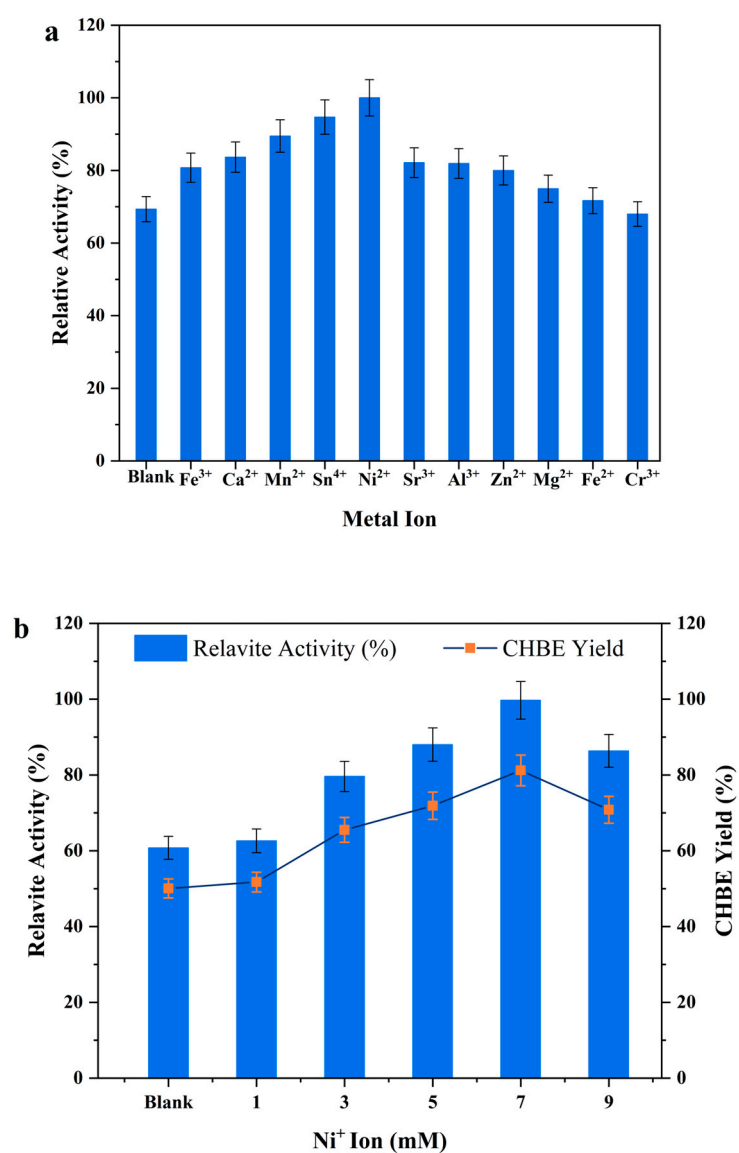

**Figure S2.** Effects of different metal ions on the catalytic reactions [100 mM COBE, 30 °C and pH 7.0] (**a**); Effects of different Ni<sup>2+</sup> concentration on the catalytic reactions [100 mM COBE, 30 °C and pH 7.0] (**b**).

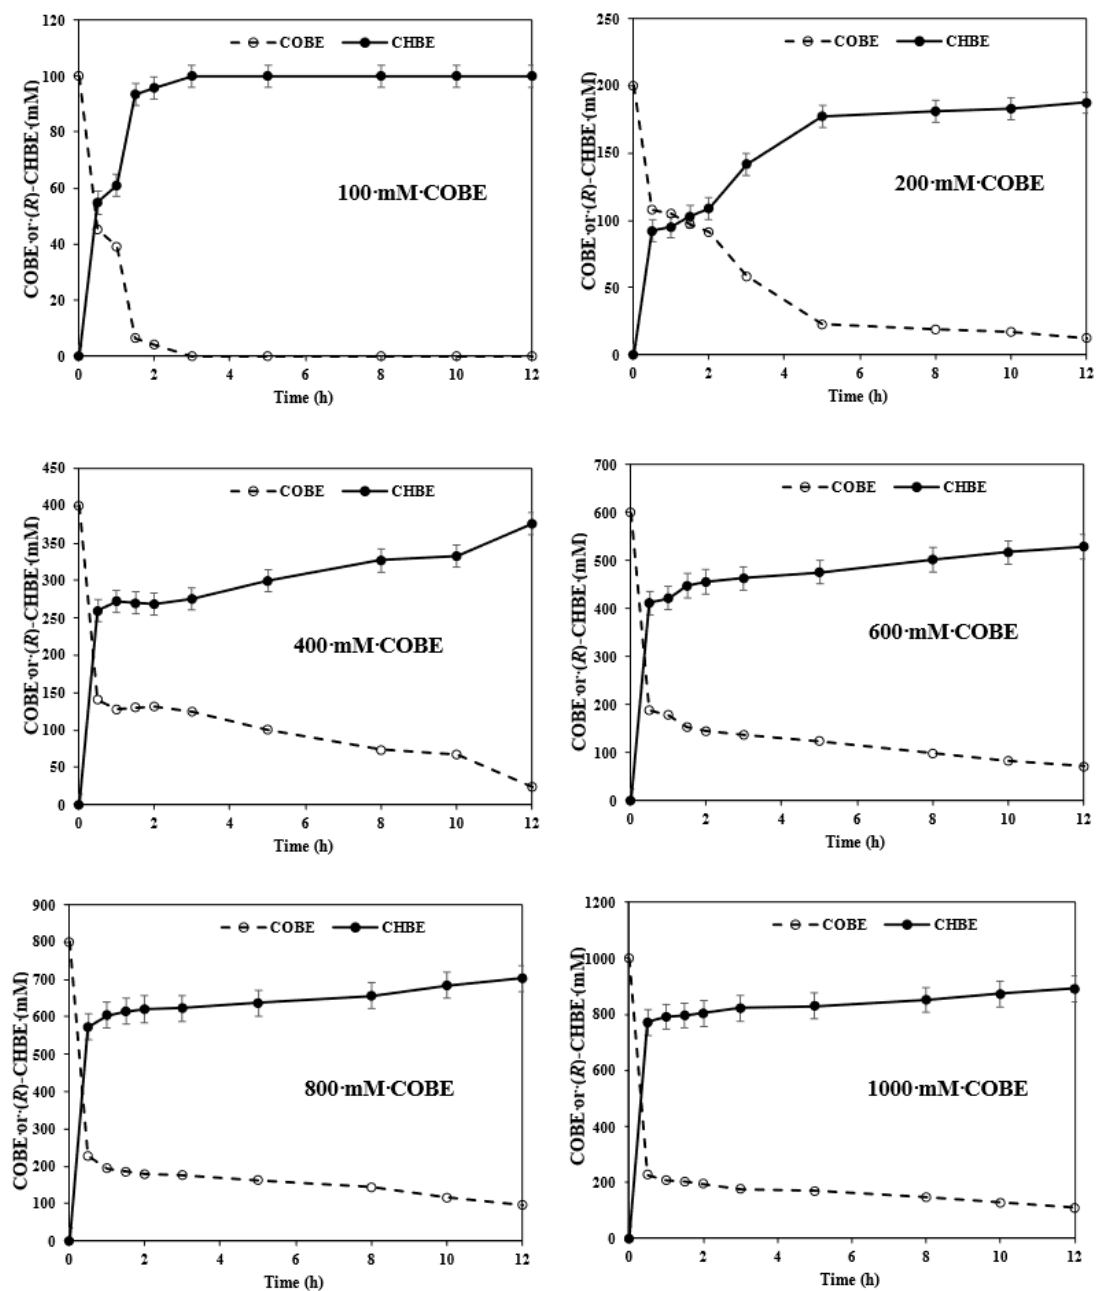

**Figure S3.** Effect of COBE concentration on the biocatalytic reaction [30 °C and pH 7.0].

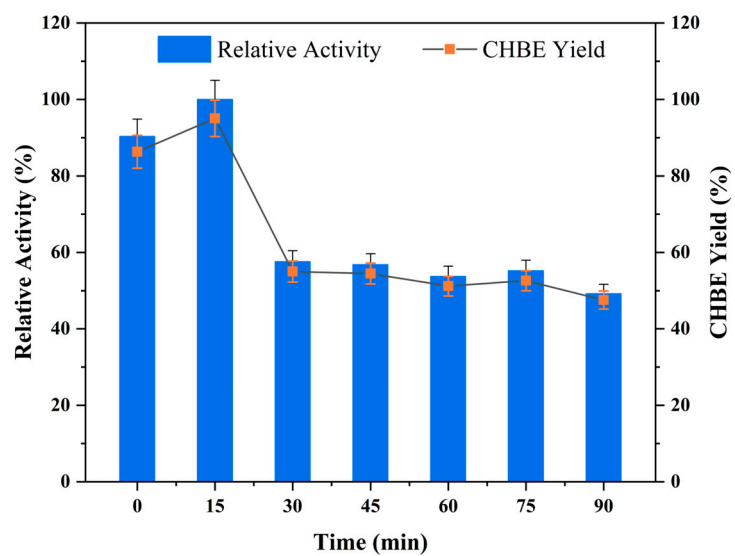

**Figure S4.** Influence of different crushing time on the cell catalytic reaction [100 mM COBE, 30 °C and pH 7.0]

**Table S1.** Effects of different additives on total cell membrane permeability of CgCR.

| <b>Solvent</b>                         | <b>OD<sub>260</sub></b> | <b>OD<sub>280</sub></b> |
|----------------------------------------|-------------------------|-------------------------|
| Blank                                  | 0.108 ± 0.004           | 0.059 ± 0.003           |
| Betaine:lactic acid                    | 0.180 ± 0.001           | 0.098 ± 0.005           |
| Ethyl acetate                          | 1.013 ± 0.009           | 0.417 ± 0.008           |
| Betaine:lactic acid plus ethyl acetate | 1.211 ± 0.012           | 0.599 ± 0.011           |
